# Supplementary material for: Prospective Home-use Study on Non-invasive Neuromodulation Therapy for Essential Tremor
Source: PubMed Central journal article supplement (PMC7427656; doi:10.5334/tohm.59), 2020-08-14
Supplement: tohm-10-1-59-s4.pdf [file tohm-10-1-59-s4.pdf]

**Supplemental Table 1. Co-primary outcomes by task for full study population compared to patient subgroups with at least mild tremor power task.** The left columns (“Patients with baseline score  $\geq 2$ ”) are reproduced from Table 3. The added right columns (“All patients (N = 205)”) illustrate how responder rates would decrease if considering all patients, including those who did not have appreciable tremor in the assessed task. This decrease is expected, as there is a ceiling effect on improvement: patients already at a score of 1 or 0 on TETRAS pre-stimulation are unlikely to or cannot improve on the TETRAS scale with any therapy; and similarly, patients at a score of 1 on BF-ADL pre-stimulation cannot improve on the BF-ADL scale with therapy.

| Task                            | Patients with baseline score $\geq 2^*$ |                    |                       |                  |                                  | All patients (N = 205) |                       |                  |                                  |
|---------------------------------|-----------------------------------------|--------------------|-----------------------|------------------|----------------------------------|------------------------|-----------------------|------------------|----------------------------------|
|                                 | Patient count per task <sup>1</sup>     | Baseline Mean (SD) | Final visit Mean (SD) | Change Mean (SD) | % Patients improved <sup>2</sup> | Baseline Mean (SD)     | Final visit Mean (SD) | Change Mean (SD) | % Patients improved <sup>2</sup> |
| <b>TETRAS Tasks<sup>3</sup></b> |                                         |                    |                       |                  |                                  |                        |                       |                  |                                  |
| Forward Outstretched            | 124                                     | 2.2 (0.3)          | 1.5 (0.6)             | -0.6 (0.6)*      | 78%                              | 1.8 (0.5)              | 1.3 (0.7)             | -0.5 (0.6)*      | 64%                              |
| Lateral                         | 140                                     | 2.3 (0.4)          | 1.7 (0.7)             | -0.6 (0.6)*      | 80%                              | 2.0 (0.6)              | 1.5 (0.7)             | -0.5 (0.6)*      | 74%                              |
| Kinetic                         | 163                                     | 2.3 (0.4)          | 1.7 (0.6)             | -0.6 (0.5)*      | 79%                              | 2.1 (0.6)              | 1.6 (0.7)             | -0.6 (0.6)*      | 73%                              |
| Spiral                          | 161                                     | 2.5 (0.7)          | 2.0 (0.8)             | -0.5 (0.8)*      | 58%                              | 2.2 (0.9)              | 1.9 (0.8)             | -0.3 (0.9)*      | 51%                              |
| Handwriting                     | 144                                     | 2.8 (0.7)          | 2.0 (1.0)             | -0.8 (0.8)*      | 67%                              | 2.3 (1.1)              | 1.7 (1.1)             | -0.6 (0.9)*      | 57%                              |
| Dot Approximation               | 155                                     | 2.4 (0.5)          | 1.9 (0.7)             | -0.4 (0.6)*      | 66%                              | 2.1 (0.6)              | 1.8 (0.7)             | -0.4 (0.6)*      | 60%                              |
| <b>BF-ADL Tasks<sup>4</sup></b> |                                         |                    |                       |                  |                                  |                        |                       |                  |                                  |
| Use a spoon to drink soup       | 196                                     | 2.9 (0.6)          | 2.0 (0.9)             | -0.9 (0.8)*      | 70%                              | 2.8 (0.7)              | 2.0 (0.9)             | -0.8 (0.9)*      | 67%                              |
| Hold a cup of tea               | 192                                     | 2.8 (0.7)          | 1.8 (0.9)             | -1.0 (0.9)*      | 71%                              | 2.7 (0.8)              | 1.8 (0.9)             | -0.9 (0.9)*      | 66%                              |
| Pour milk from a bottle         | 182                                     | 2.8 (0.7)          | 1.8 (0.9)             | -1.0 (0.9)*      | 69%                              | 2.4 (0.8)              | 1.7 (0.9)             | -0.7 (0.9)*      | 61%                              |
| Dial a telephone                | 131                                     | 2.6 (0.7)          | 1.8 (0.9)             | -0.8 (0.8)*      | 76%                              | 1.9 (0.8)              | 1.4 (0.6)             | -0.5 (0.9)*      | 49%                              |
| Pick up change                  | 134                                     | 2.6 (0.7)          | 1.8 (0.9)             | -0.8 (0.8)*      | 69%                              | 1.9 (0.8)              | 1.4 (0.6)             | -0.4 (0.8)*      | 45%                              |
| Insert an electric plug         | 134                                     | 2.4 (0.5)          | 1.5 (0.6)             | -0.9 (0.8)*      | 69%                              | 1.8 (0.7)              | 1.4 (0.6)             | -0.5 (0.8)*      | 45%                              |
| Unlock front door               | 148                                     | 2.4 (0.5)          | 1.5 (0.6)             | -0.9 (0.8)*      | 72%                              | 2.0 (0.7)              | 1.4 (0.6)             | -0.5 (0.8)*      | 52%                              |
| Write a letter                  | 192                                     | 2.3 (0.5)          | 1.5 (0.7)             | -0.8 (0.8)*      | 61%                              | 2.9 (0.8)              | 2.2 (0.9)             | -0.7 (0.9)*      | 57%                              |

\*p << 0.0001 after Holm-Bonferroni corrections for multiple hypothesis testing

<sup>1</sup> Count of patients scoring at least “Mild” per task (2 on TETRAS or BF-ADL)

<sup>2</sup> Defined as % patients improving at least one increment (0.5 or 1, depending on scale and task)

<sup>3</sup> Each TETRAS task rated 0-4 by clinician (0 = normal, 1 = slight, 2 = mild, 3 = moderate, 4 = severe)

<sup>4</sup> Each BF-ADL task rated 1-4 by patient (1 = without difficulty, 2 = with a little effort, 3 = with a lot of effort, 4 = cannot do by yourself).
